# Supplementary material
Source: PubMed Central journal article supplement (PMC6777805)

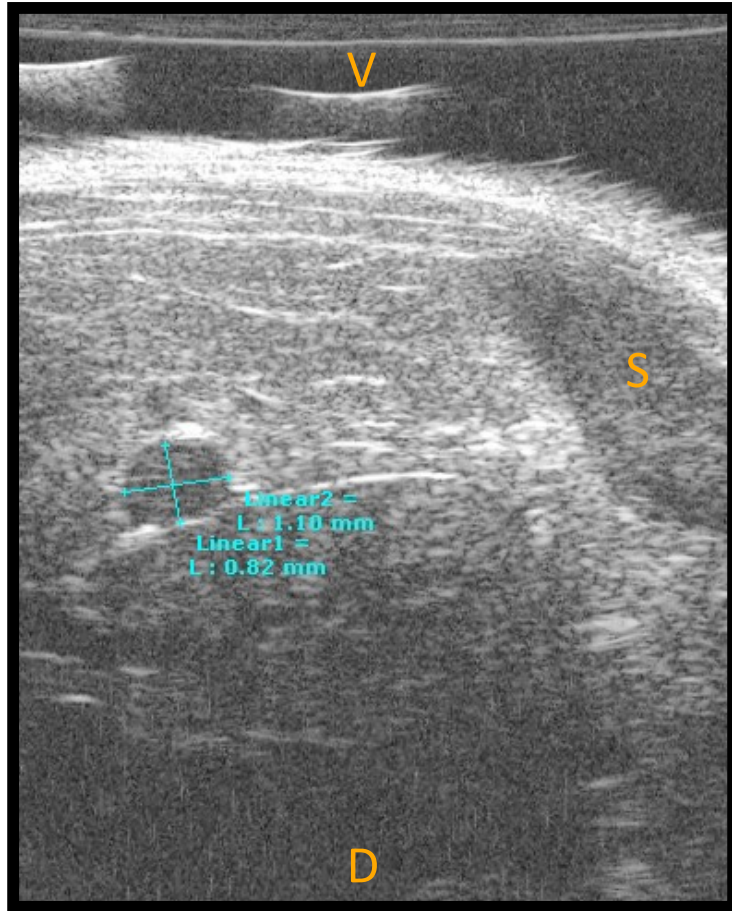

Supplementary Figure 1

Krt19

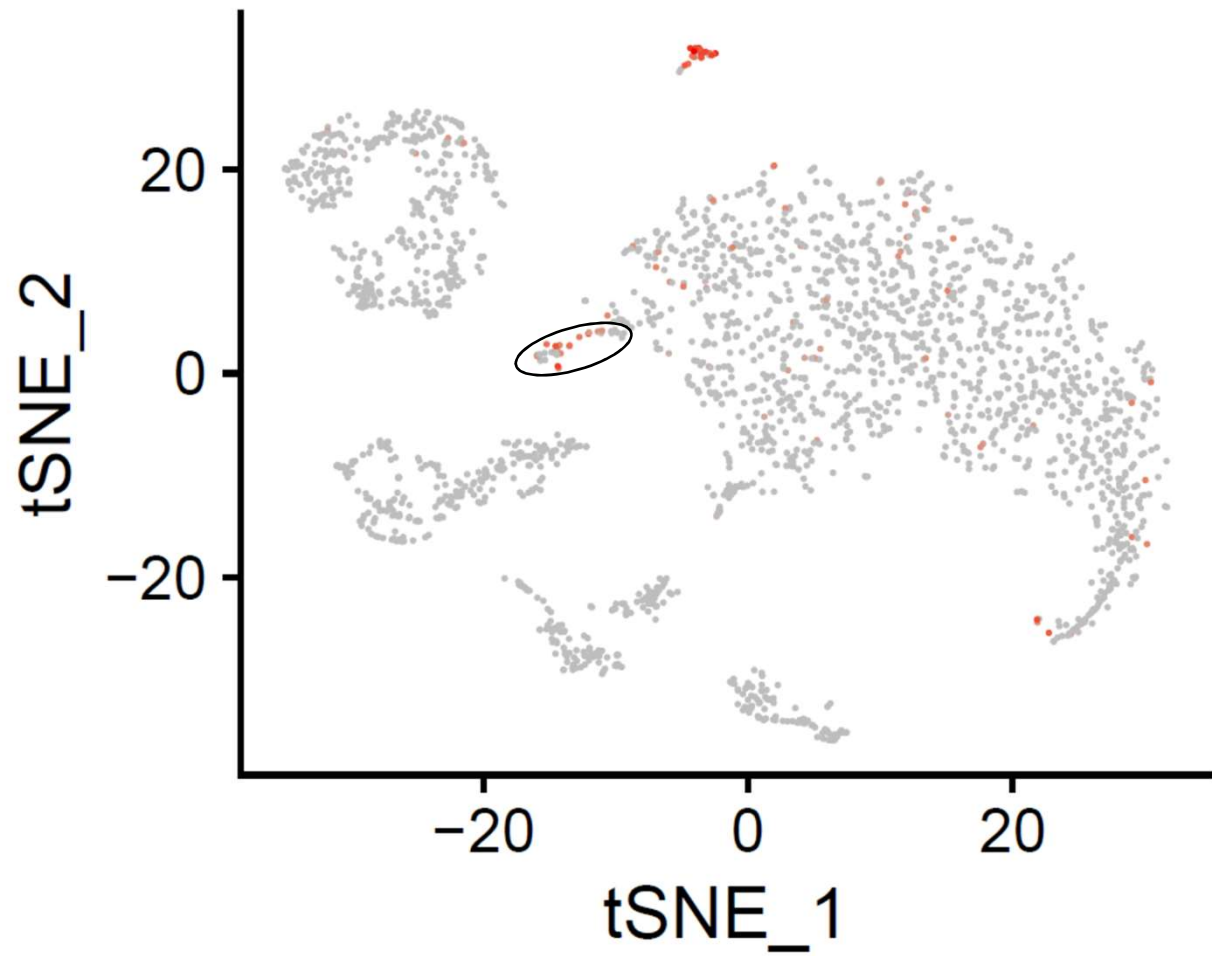

Pyy

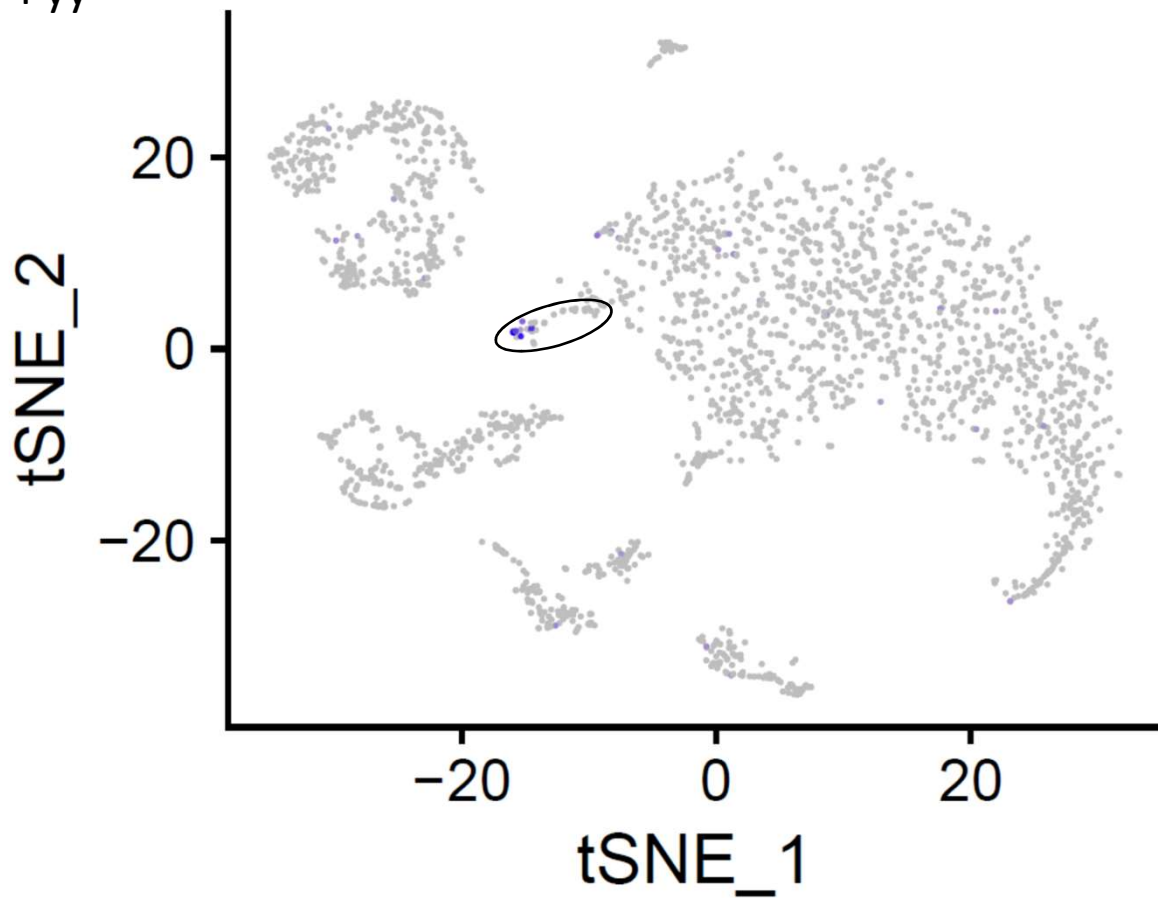

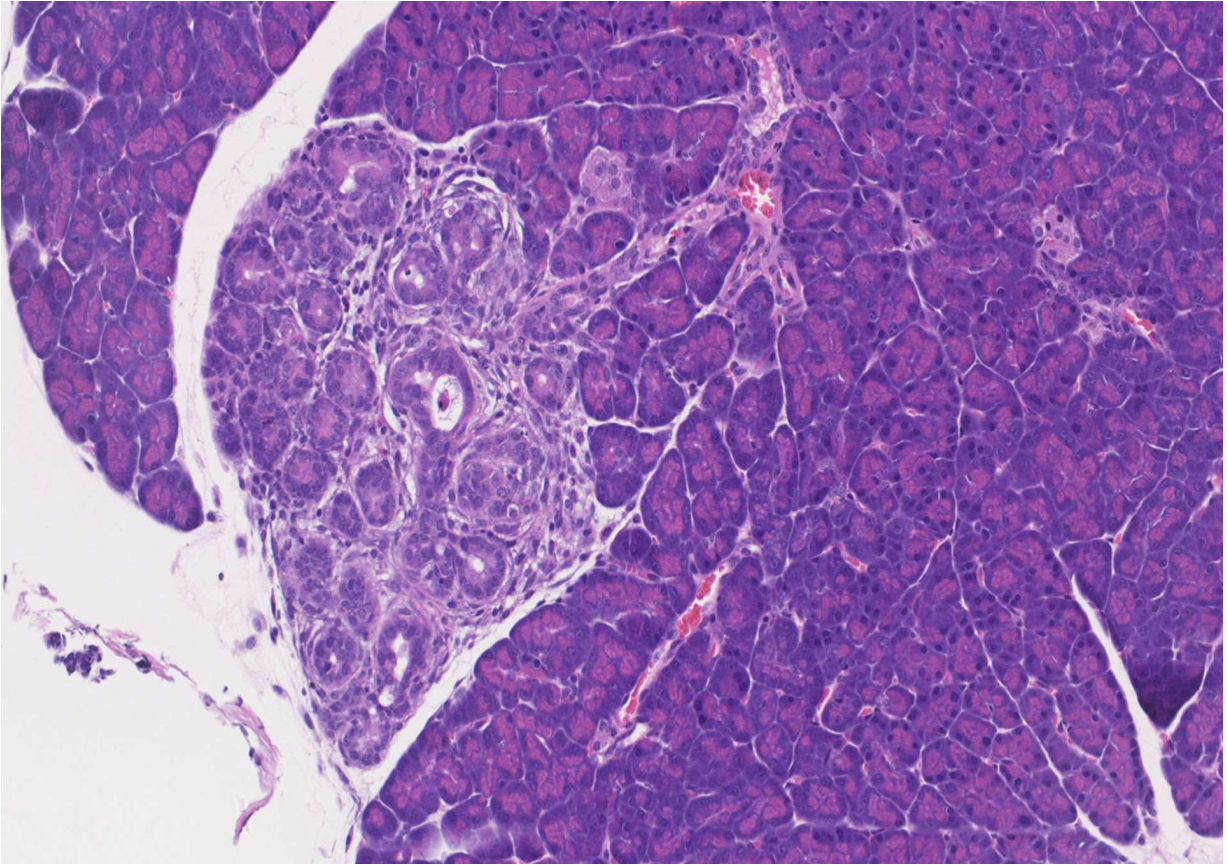

SOX9/ VIMENTIN

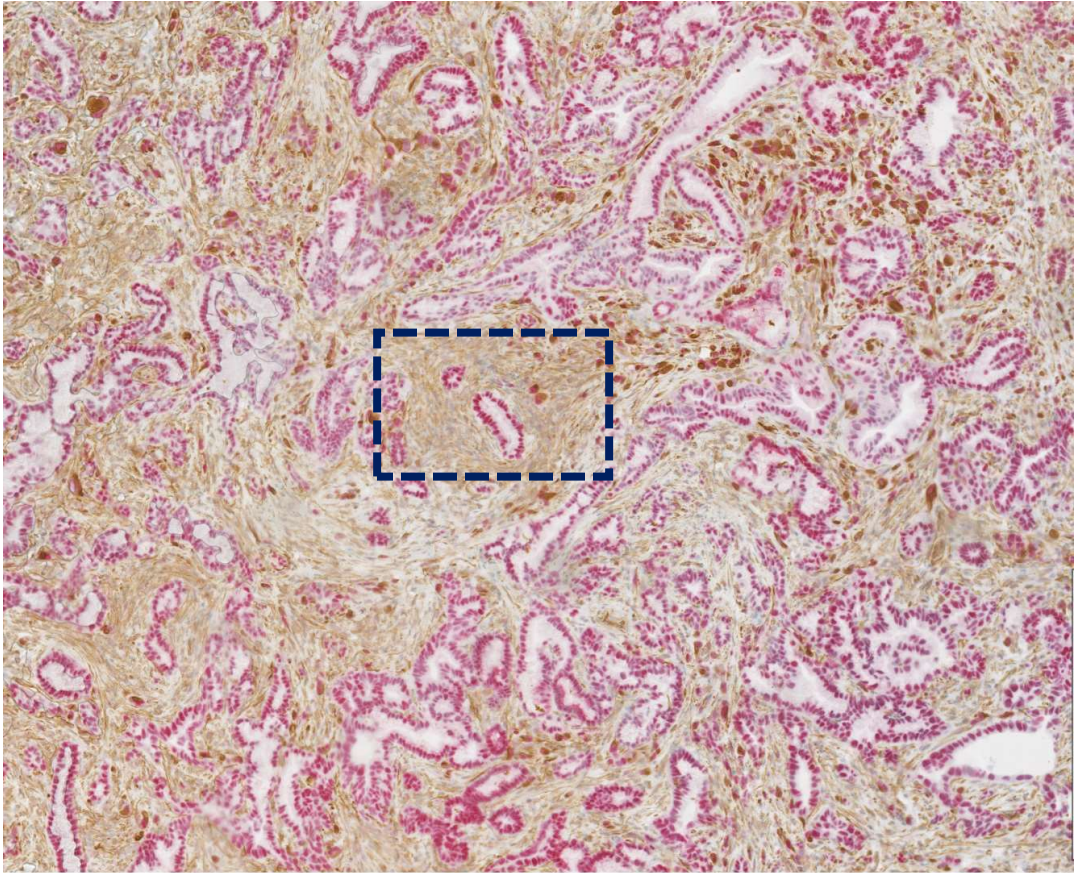

8x magnification

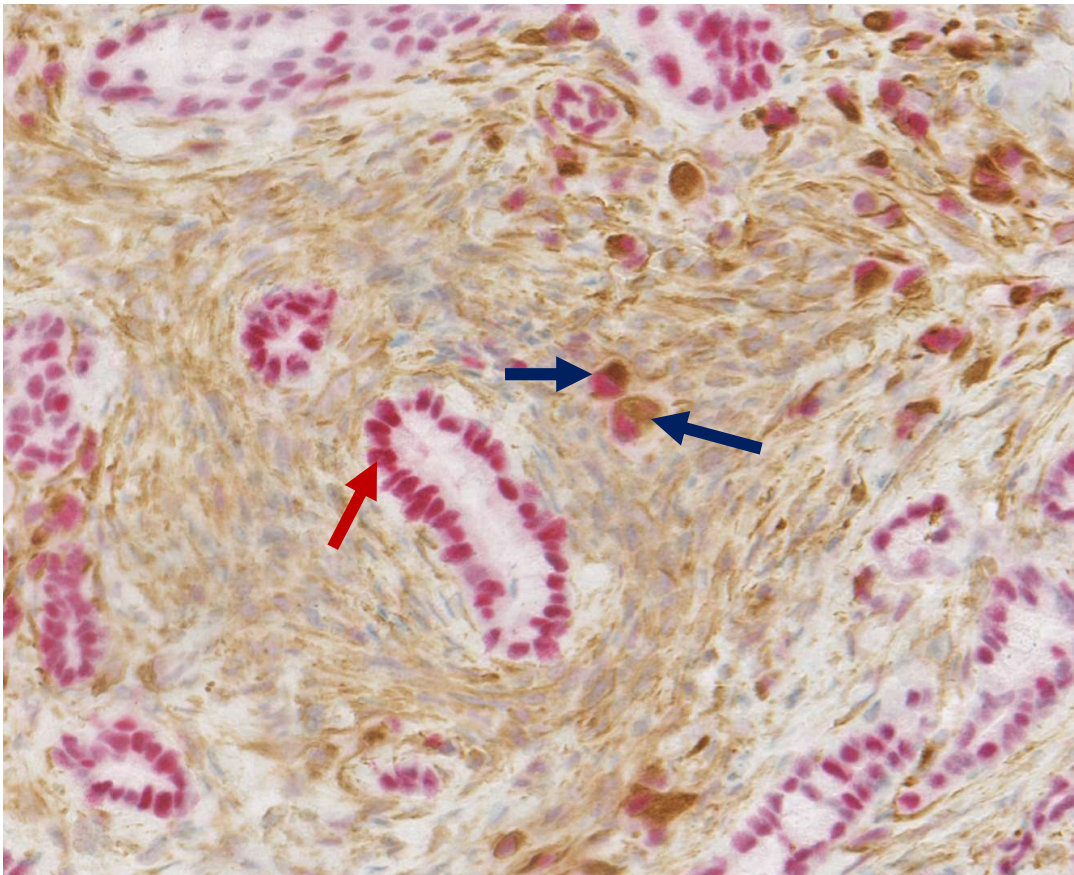

30x magnification

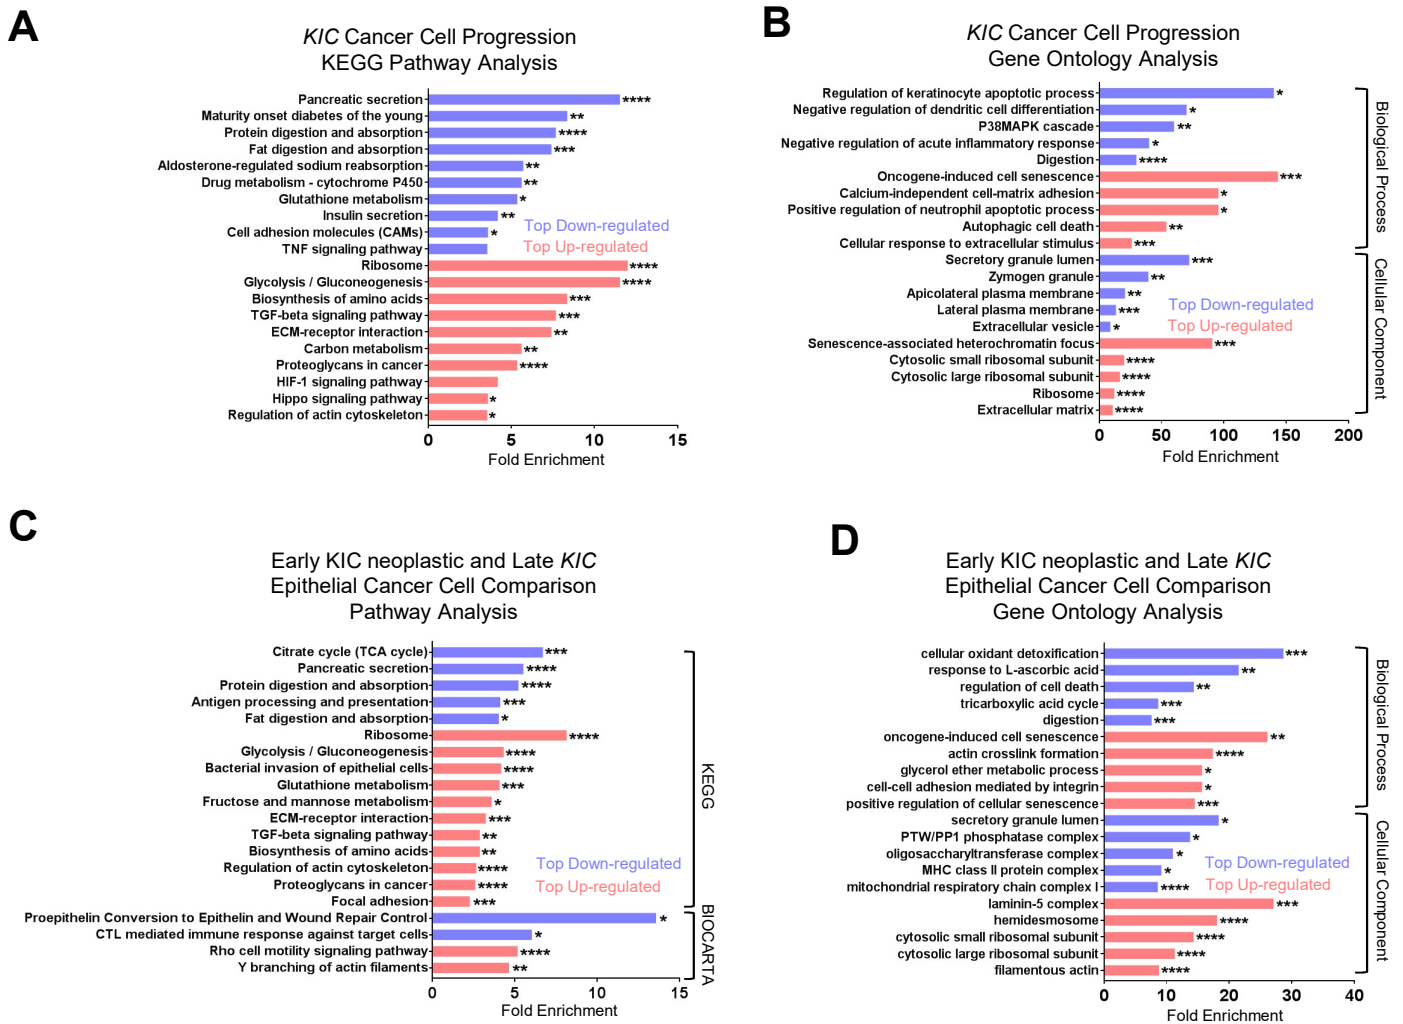

**A**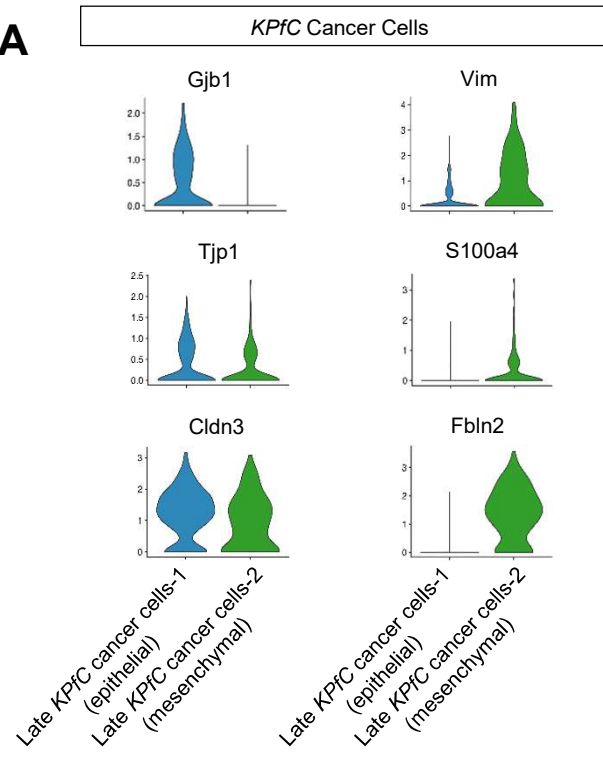**B**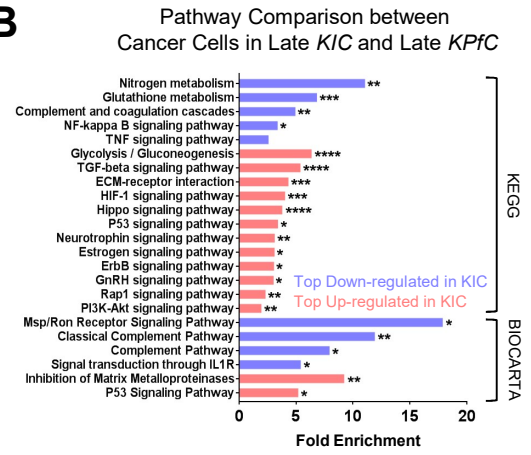

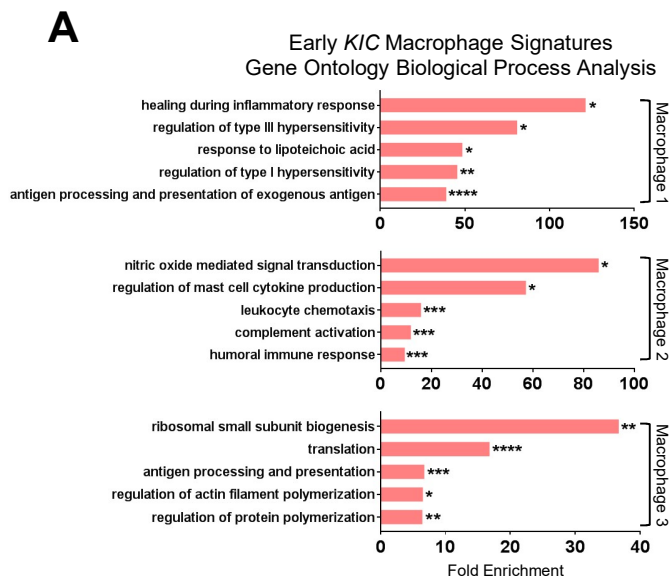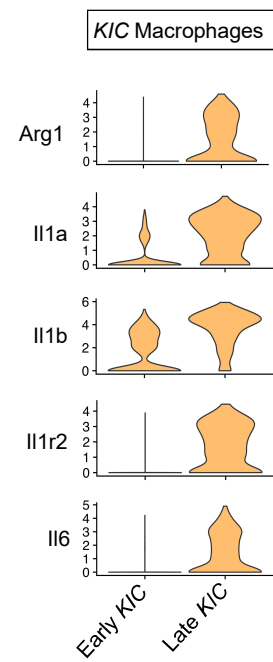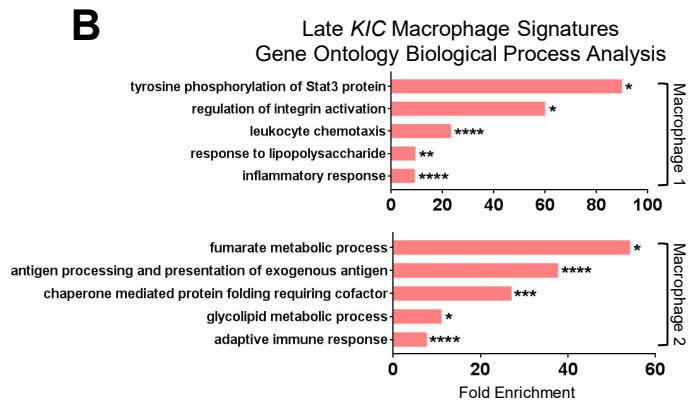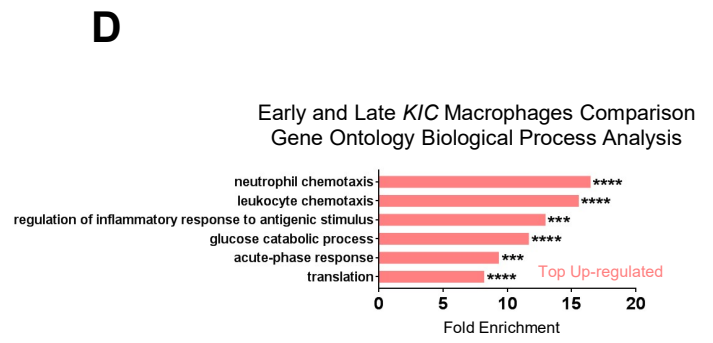

KPFC Macrophages

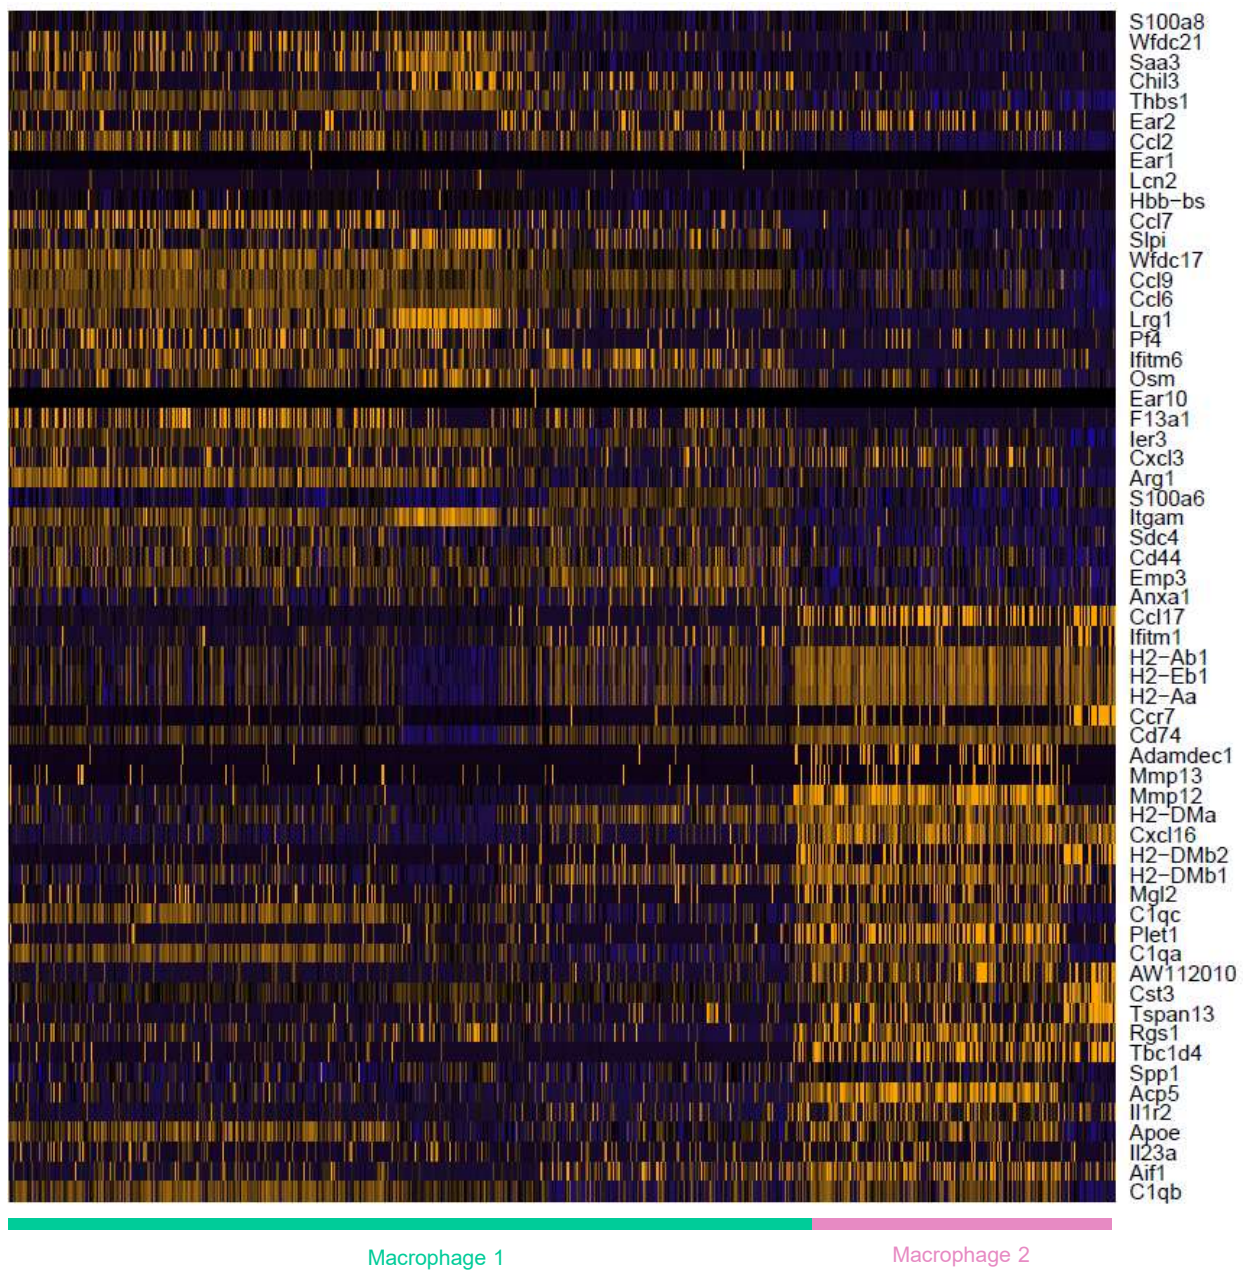



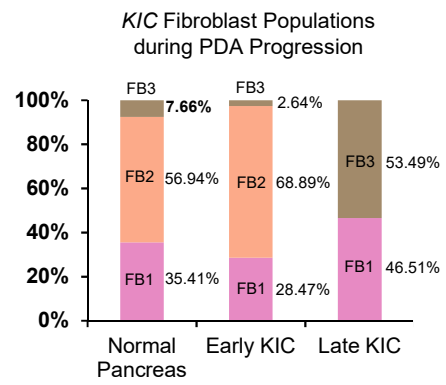

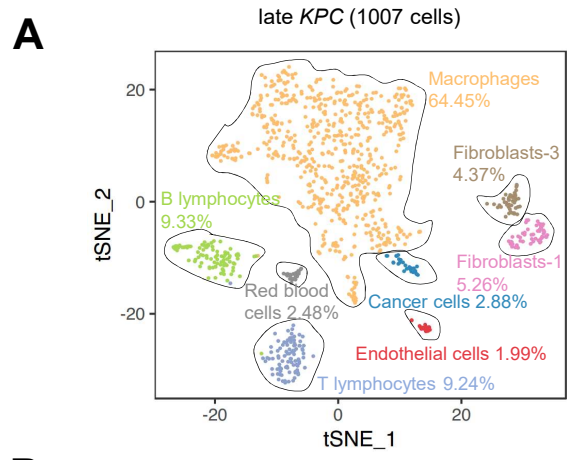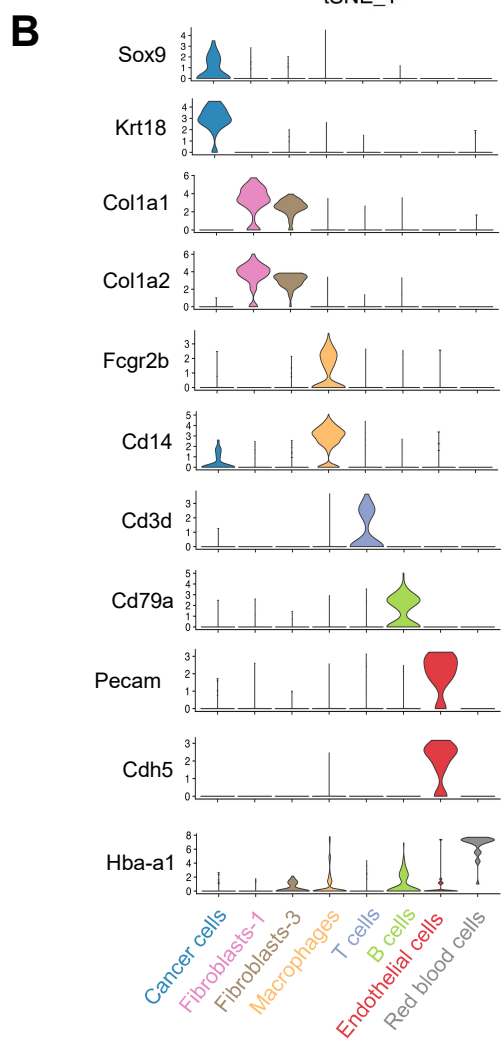

**A**

PDA Fibroblast Signatures  
Gene Ontology Biological Process Analysis

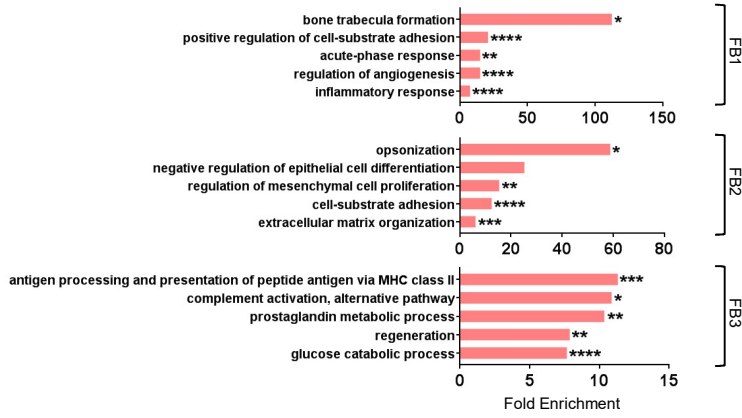**B**

## K/I C FB1 Increasing Signature

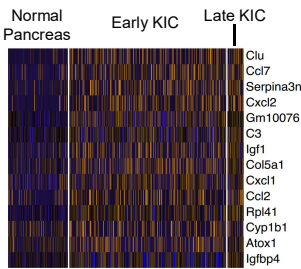

## K/I C FB3 Increasing Signature

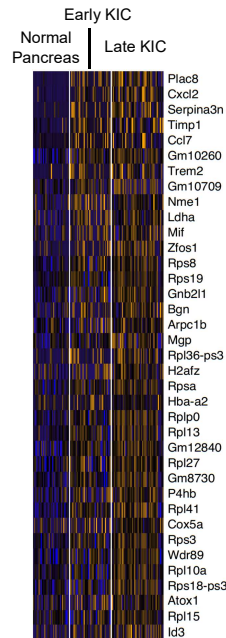**C**

## Gene Ontology Analysis of K/I C Fibroblast Increasing Signature

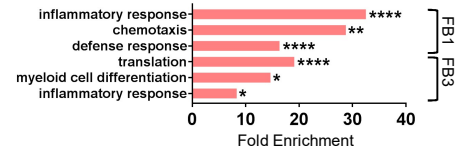**D**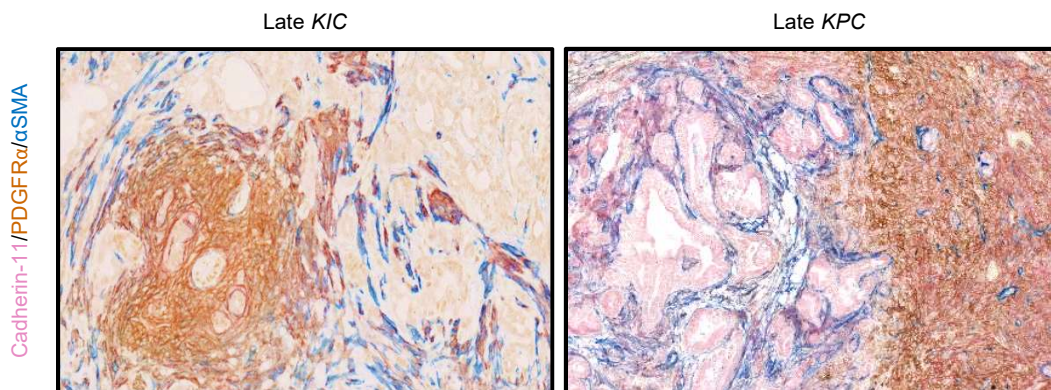

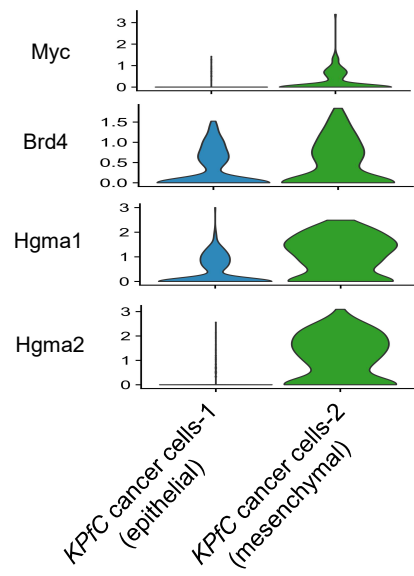

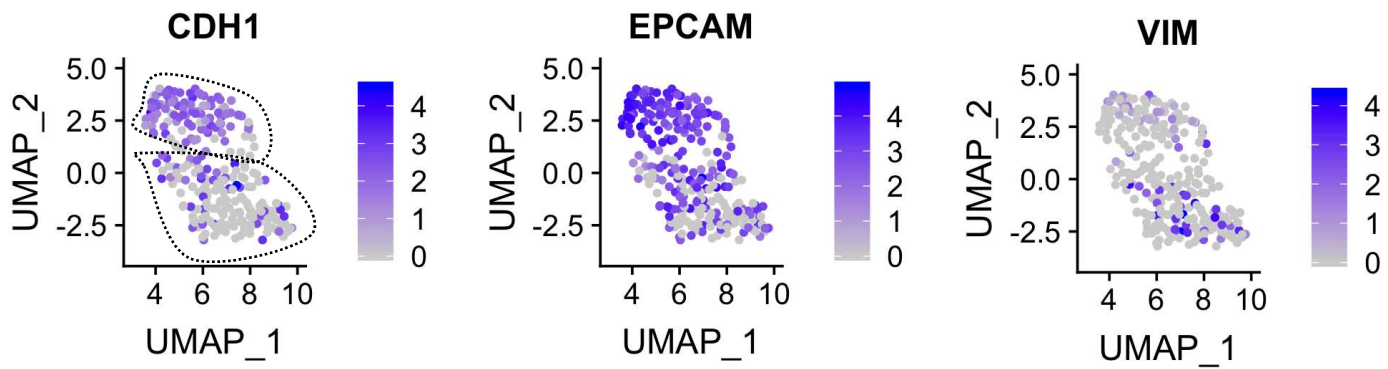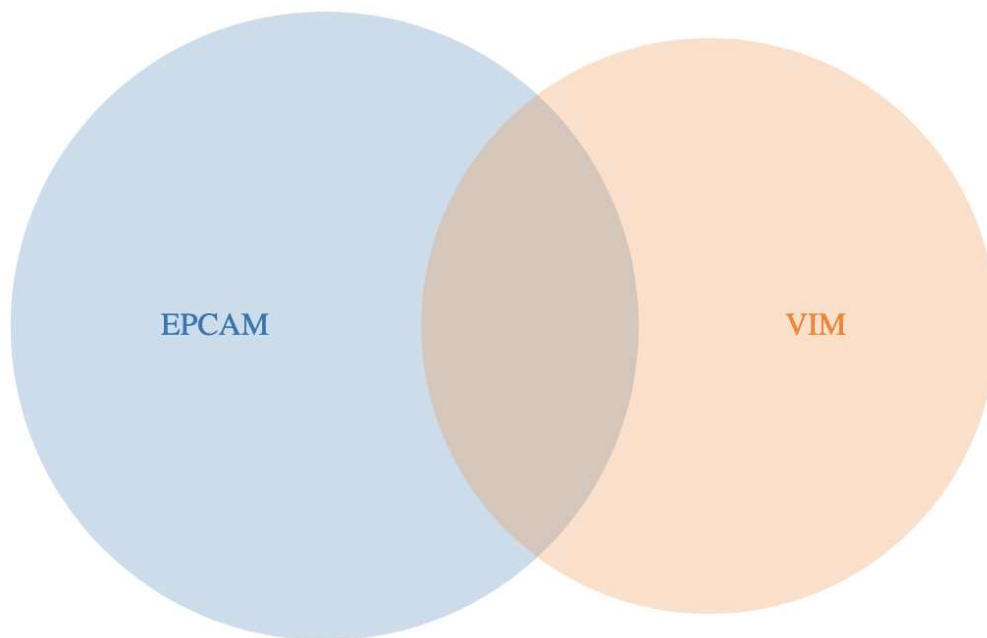

Supplement: jciinsight-4-129212-s118.pdf [file jciinsight-4-129212-s118.pdf]
